# Supplementary material for: Impact of Vanadium-Containing Stone Coal Smelting on Trace Metals in an Agricultural Soil–Vegetable System: Accumulation, Transfer, and Health Risks
Source: MDPI journal article supplement (doi:10.3390/ijerph20032425), 2023-01-30
Supplement: s1 [file s1]

## **Supporting information**

Title: Impact of vanadium-containing stone coal smelting on trace metals in an agricultural soil-vegetable system: Accumulation, transfer, and health risks

Author: Zhichao Jiang, Xiyuan Xiao \*, Zhaohui Guo, Yunxia Zhang, Xiaoxiao Huang

Address: School of Metallurgy and Environment, Central South University, Changsha 410083, China

\*Corresponding author

E-mail address: xiaoxy@csu.edu.cn

Pages = 7

Figure = 1

Tables = 4

## List

1. **Figure S1** The bioaccumulation factor (BAF) of trace metals in vegetables around the V-containing stone coal smelting site. Values followed by different lowercase letters are significantly different at  $\alpha = 0.05$ .
2. **Table S1** Seven classes of geo-accumulation index.
3. **Table S2** Description and values of factors used in risk assessment (**Liu et al., 2021; USEPA, 2015**).
4. **Table S3** Reference dose (RfD) of trace metals (**USEPA, 2015**).
5. **Table S4** Correlation coefficient matrix of the total content of trace metals (TMs) in agricultural soils and their BAF values for vegetables.

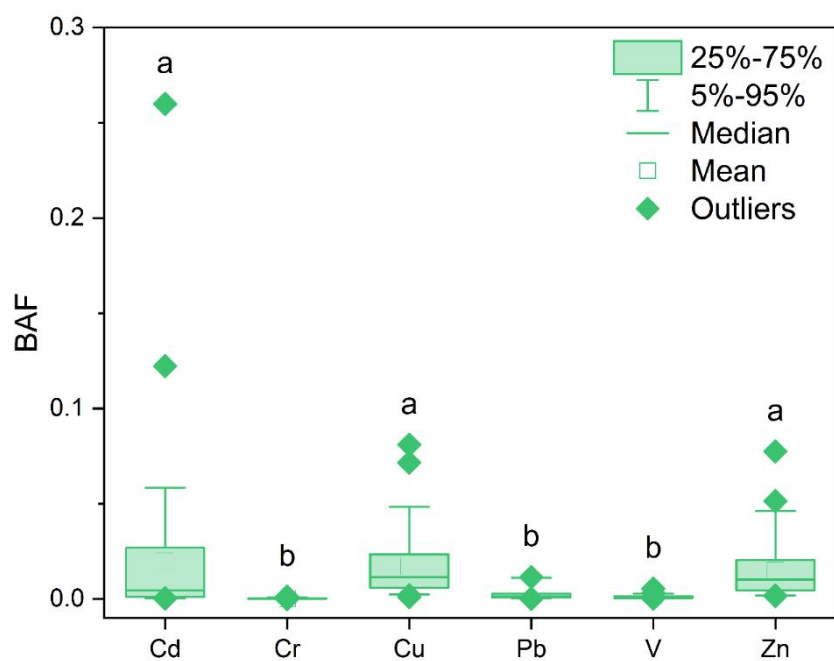

**Figure S1** The bioaccumulation factor (BAF) of trace metals in vegetables around the V-containing stone coal smelting site. Values followed by different lowercase letters are significantly different at  $\alpha = 0.05$ .

**Table S1** Seven classes of geo-accumulation index.

| Class | Value                    | Soil quality                              |
|-------|--------------------------|-------------------------------------------|
| 0     | $I_{\text{geo}} \leq 0$  | Practically uncontaminated                |
| 1     | $0 < I_{\text{geo}} < 1$ | Uncontaminated to moderately contaminated |
| 2     | $1 < I_{\text{geo}} < 2$ | Moderately contaminated                   |
| 3     | $2 < I_{\text{geo}} < 3$ | Moderately to heavily contaminated        |
| 4     | $3 < I_{\text{geo}} < 4$ | Heavily contaminated                      |
| 5     | $4 < I_{\text{geo}} < 5$ | Heavily to extremely contaminated         |
| 6     | $5 < I_{\text{geo}}$     | Extremely contaminated                    |

**Table S2** Description and values of factors used in risk assessment (Liu et al., 2021; USEPA, 2015).

| Parameter                             | Abbreviation                   | Value | Unit     |
|---------------------------------------|--------------------------------|-------|----------|
| Body weight <sup>a</sup>              | BW <sub>a</sub>                | 60.0  | kg       |
| Body weight <sup>c</sup>              | BW <sub>c</sub>                | 26.0  | kg       |
| Vegetable ingestion rate <sup>a</sup> | IR <sub>vge</sub> <sup>a</sup> | 244   | g/day    |
| Vegetable ingestion rate <sup>c</sup> | IR <sub>vge</sub> <sup>c</sup> | 186   | g/day    |
| Exposure frequency                    | EF                             | 365   | day/year |
| Exposure duration <sup>a</sup>        | ED <sub>a</sub>                | 30    | year     |
| Exposure duration <sup>c</sup>        | ED <sub>c</sub>                | 7     | year     |

<sup>a</sup> for adults; <sup>c</sup> for children.

**Table S3** Reference dose (RfD) of trace metals (USEPA, 2015).

| Metal | RfD for ingestion (mg/kg-day) |
|-------|-------------------------------|
| Cd    | 1.00E-03                      |
| Cr    | 3.00E-03                      |
| Cu    | 4.00E-02                      |
| Pb    | 3.50E-03                      |
| V     | 5.00E-03                      |
| Zn    | 3.00E-01                      |

**Table S4** Correlation coefficient matrix of the total content of trace metals (TMs) in agricultural soils and their BAF values for vegetables.

| BAF | Total TM contents |
|-----|-------------------|
| Cd  | -0.424**          |
| Cr  | -0.438*           |
| Cu  | -0.561*           |
| Pb  | -0.240            |
| V   | -0.496**          |
| Zn  | -0.299            |

\*,  $p < 0.05$ , and \*\*,  $p < 0.01$ .

## References

- Liu, X., Gu, S., Yang, S., Deng, J., Xu, J., 2021. Heavy metals in soil-vegetable system around E-waste site and the health risk assessment. *Sci. Total Environ.* 779, 146438.
- USEPA (United States Environmental Protection Agency). *Integrated Risk Information System-database*; USEPA: Washington, DC, USA, 2015.
